# Supplementary material for: Male-Biased Autosomal Effect of 16p13.11 Copy Number Variation in Neurodevelopmental Disorders
Source: PubMed Central journal article supplement (PMC3630198; doi:10.1371/journal.pone.0061365), 2013-04-18
Supplement: pone.0061365.s003.pdf [file pone.0061365.s003.pdf]

**Table S1.** Genotype–phenotype correlation for patients with duplication or deletion of 16p13.11 identified in the clinical referral series

| Case | Diagnosis                                                                                                                                                                                                                                                                                                                              | Age   | Sex | Imbalance count | HG19 start | HG19 stop  | Size      | Inheritance | CNV  | CNV Interval | Genes encompassed by the CNV                                                                                                                                                                           | Other imbalance                                             |
|------|----------------------------------------------------------------------------------------------------------------------------------------------------------------------------------------------------------------------------------------------------------------------------------------------------------------------------------------|-------|-----|-----------------|------------|------------|-----------|-------------|------|--------------|--------------------------------------------------------------------------------------------------------------------------------------------------------------------------------------------------------|-------------------------------------------------------------|
| 1    | Autistic spectrum disorder, learning difficulties                                                                                                                                                                                                                                                                                      | 10yrs | M   | 1               | 15,131,723 | 15,154,746 | 23,024    | De novo     | x1 ↓ | I            | NTAN1, RRN3                                                                                                                                                                                            | n/a                                                         |
| 2    | Attention difficulties, delayed speech and language skills, dysmorphic features                                                                                                                                                                                                                                                        | 5 yrs | M   | 2               | 15,131,723 | 15,154,746 | 23,024    | De novo     | x1 ↓ | I            | NTAN1, RRN3                                                                                                                                                                                            | x2 ↑,<br>chrX:<br>29,488,548-<br>29,973,532<br>(Maternal)   |
| 3    | ASD                                                                                                                                                                                                                                                                                                                                    | 7 yrs | M   | 2               | 14,780,135 | 16,305,736 | 1,525,602 | N/K         | x3 ↑ | I-II         | PLA2G10, ABCC6P2, NOMO1, MIR3179-1, MIR3179-2, MIR3179-3, MIR3180-1, MIR3180-2, MIR3180-3, NPIP, PDXDC1, NTAN1, RRN3, MIR3180-4, MPV17L, C16orf45, KIAA0430, NDE1, MIR484, MYH11, FOPNL, ABCC1, ABCC6. | x3 ↑,<br>chr6:<br>105,548,869-<br>106,951,653<br>(Maternal) |
| 4    | ASD, ventricular septal defect                                                                                                                                                                                                                                                                                                         | 4 yrs | M   | 1               | 14,944,560 | 16,223,052 | 1,278,493 | Paternal    | x3 ↑ | I-II         | NOMO1, MIR3179-1, MIR3179-2, MIR3179-3, MIR3180-1, MIR3180-2, MIR3180-3, NPIP, PDXDC1, NTAN1, RRN3, MIR3180-4, MPV17L, C16orf45, KIAA0430, NDE1, MIR484, MYH11, FOPNL, ABCC1.                          | n/a                                                         |
| 5    | N/K                                                                                                                                                                                                                                                                                                                                    | N/K   | M   | 1               | 14,944,560 | 16,249,607 | 1,305,048 | N/K         | x3 ↑ | I-II         | NOMO1, MIR3179-1, MIR3179-2, MIR3179-3, MIR3180-1, MIR3180-2, MIR3180-3, NPIP, PDXDC1, NTAN1, RRN3, MIR3180-4, MPV17L, C16orf45, KIAA0430, NDE1, MIR484, MYH11, FOPNL, ABCC1, ABCC6.                   | n/a                                                         |
| 6    | Delayed gross motor skills, motor planning problem, social communication difficulty                                                                                                                                                                                                                                                    | 3 yrs | F   | 1               | 14,944,560 | 16,276,115 | 1,331,556 | Paternal    | x3 ↑ | I-II         | NOMO1, MIR3179-1, MIR3179-2, MIR3179-3, MIR3180-1, MIR3180-2, MIR3180-3, NPIP, PDXDC1, NTAN1, RRN3, MIR3180-4, MPV17L, C16orf45, KIAA0430, NDE1, MIR484, MYH11, FOPNL, ABCC1, ABCC6.                   | n/a                                                         |
| 7    | Absent teeth, bilateral low set ears, chest asymmetry, developmental delay, dysmorphic features., facial asymmetry, gastro-oesophageal reflux, hearing loss, inguinal hernia, inverted left nipple, IUGR/growth failure, lack of hair, metabolic bone disease, plagiocephaly, pseudohydrocephalus, triangular face, undescended testes | 5 yrs | M   | 1               | 14,944,560 | 16,305,736 | 1,361,177 | Maternal    | x3 ↑ | I-II         | NOMO1, MIR3179-1, MIR3179-2, MIR3179-3, MIR3180-1, MIR3180-2, MIR3180-3, NPIP, PDXDC1, NTAN1, RRN3, MIR3180-4, MPV17L, C16orf45, KIAA0430, NDE1, MIR484, MYH11, FOPNL, ABCC1, ABCC6.                   | n/a                                                         |

|    |                                                                                                                          |        |   |   |            |            |           |          |      |      |                                                                                                                                                                                      |                                                        |
|----|--------------------------------------------------------------------------------------------------------------------------|--------|---|---|------------|------------|-----------|----------|------|------|--------------------------------------------------------------------------------------------------------------------------------------------------------------------------------------|--------------------------------------------------------|
| 8  | Global developmental delay                                                                                               | 2 yrs  | M | 1 | 14,944,560 | 16,305,736 | 1,361,177 | Paternal | x3 ↑ | I-II | NOMO1, MIR3179-1, MIR3179-2, MIR3179-3, MIR3180-1, MIR3180-2, MIR3180-3, NPIP, PDXDC1, NTAN1, RRN3, MIR3180-4, MPV17L, C16orf45, KIAA0430, NDE1, MIR484, MYH11, FOPNL, ABCC1, ABCC6. | n/a                                                    |
| 9  | DCM, learning difficulties, speech problems                                                                              | 48 yrs | M | 1 | 14,944,560 | 16,305,736 | 1,361,177 | N/K      | x3 ↑ | I-II | NOMO1, MIR3179-1, MIR3179-2, MIR3179-3, MIR3180-1, MIR3180-2, MIR3180-3, NPIP, PDXDC1, NTAN1, RRN3, MIR3180-4, MPV17L, C16orf45, KIAA0430, NDE1, MIR484, MYH11, FOPNL, ABCC1, ABCC6. | n/a                                                    |
| 10 | Arithmetic difficulties, learning difficulties, reading and spelling difficulties, some dysmorphic features              | 44 yrs | F | 1 | 14,944,560 | 16,305,736 | 1,361,177 | Paternal | x3 ↑ | I-II | NOMO1, MIR3179-1, MIR3179-2, MIR3179-3, MIR3180-1, MIR3180-2, MIR3180-3, NPIP, PDXDC1, NTAN1, RRN3, MIR3180-4, MPV17L, C16orf45, KIAA0430, NDE1, MIR484, MYH11, FOPNL, ABCC1, ABCC6. | n/a                                                    |
| 11 | Developmental delay, ectopic kidney, microcephaly, renal failure, small for age, UTI                                     | 2 yrs  | F | 2 | 14,944,560 | 16,305,736 | 1,361,177 | N/K      | x3 ↑ | I-II | NOMO1, MIR3179-1, MIR3179-2, MIR3179-3, MIR3180-1, MIR3180-2, MIR3180-3, NPIP, PDXDC1, NTAN1, RRN3, MIR3180-4, MPV17L, C16orf45, KIAA0430, NDE1, MIR484, MYH11, FOPNL, ABCC1, ABCC6. | <b>x3 ↑,<br/>chr22:<br/>21,382,904-<br/>24,992,002</b> |
| 12 | ADHD                                                                                                                     | 23 yrs | F | 1 | 14,944,560 | 16,305,736 | 1,361,177 | N/K      | x3 ↑ | I-II | NOMO1, MIR3179-1, MIR3179-2, MIR3179-3, MIR3180-1, MIR3180-2, MIR3180-3, NPIP, PDXDC1, NTAN1, RRN3, MIR3180-4, MPV17L, C16orf45, KIAA0430, NDE1, MIR484, MYH11, FOPNL, ABCC1, ABCC6. | n/a                                                    |
| 13 | Developmental delay, flat nasal bridge, gray matter heterotopia, IUGR, polymicrogyria, prominent forehead                | 8/12   | M | 1 | 14,944,560 | 16,311,070 | 1,366,511 | Maternal | x3 ↑ | I-II | NOMO1, MIR3179-1, MIR3179-2, MIR3179-3, MIR3180-1, MIR3180-2, MIR3180-3, NPIP, PDXDC1, NTAN1, RRN3, MIR3180-4, MPV17L, C16orf45, KIAA0430, NDE1, MIR484, MYH11, FOPNL, ABCC1, ABCC6. | n/a                                                    |
| 14 | N/K                                                                                                                      | N/K    | M | 1 | 14,944,560 | 16,311,070 | 1,366,511 | N/K      | x3 ↑ | I-II | NOMO1, MIR3179-1, MIR3179-2, MIR3179-3, MIR3180-1, MIR3180-2, MIR3180-3, NPIP, PDXDC1, NTAN1, RRN3, MIR3180-4, MPV17L, C16orf45, KIAA0430, NDE1, MIR484, MYH11, FOPNL, ABCC1, ABCC6. | n/a                                                    |
| 15 | Global developmental delay, functioning at 24-30 months at age 42 months, plagiocephaly, small stature and growth <0.4th | 3 yrs  | M | 1 | 14,944,560 | 16,311,070 | 1,366,511 | N/K      | x3 ↑ | I-II | NOMO1, MIR3179-1, MIR3179-2, MIR3179-3, MIR3180-1, MIR3180-2, MIR3180-3, NPIP, PDXDC1, NTAN1, RRN3, MIR3180-4, MPV17L, C16orf45, KIAA0430, NDE1, MIR484, MYH11, FOPNL, ABCC1, ABCC6. | n/a                                                    |
| 16 | Global developmental delay, speech delay                                                                                 | 3 yrs  | M | 1 | 15,048,751 | 16,276,115 | 1,227,365 | Paternal | x3 ↑ | I-II | PDXDC1, NTAN1, RRN3, MIR3180-4, MPV17L, C16orf45, KIAA0430, NDE1, MIR484, MYH11, FOPNL, ABCC1, ABCC6.                                                                                | n/a                                                    |
| 17 | N/K                                                                                                                      | N/K    | F | 1 | 15,131,723 | 16,276,115 | 1,144,393 | Paternal | x3 ↑ | I-II | NTAN1, RRN3, MIR3180-4, MPV17L, C16orf45, KIAA0430, NDE1, MIR484, MYH11, FOPNL, ABCC1, ABCC6.                                                                                        | n/a                                                    |

|    |                                                                                                                                                                                                        |        |     |   |            |            |           |          |      |          |                                                                                                                                                                                      |                                                            |
|----|--------------------------------------------------------------------------------------------------------------------------------------------------------------------------------------------------------|--------|-----|---|------------|------------|-----------|----------|------|----------|--------------------------------------------------------------------------------------------------------------------------------------------------------------------------------------|------------------------------------------------------------|
| 18 | Facial assymetry, learning difficulties, muscular aches - ?myopathic, scoliosis, selective mutism                                                                                                      | 13 yrs | M   | 1 | 15,131,723 | 16,311,070 | 1,179,348 | De novo  | x3 ↑ | I-II     | NTAN1, RRN3, MIR3180-4, MPV17L, C16orf45, KIAA0430, NDE1, MIR484, MYH11, FOPNL, ABCC1, ABCC6.                                                                                        | n/a                                                        |
| 19 | Inattentive with immature behaviour, language understanding issues, poor learning pattern, small child                                                                                                 | 6 yrs  | M   | 1 | 14,944,560 | 16,276,115 | 1,331,556 | Maternal | x1 ↓ | I-II     | NOMO1, MIR3179-1, MIR3179-2, MIR3179-3, MIR3180-1, MIR3180-2, MIR3180-3, NPIP, PDXDC1, NTAN1, RRN3, MIR3180-4, MPV17L, C16orf45, KIAA0430, NDE1, MIR484, MYH11, FOPNL, ABCC1, ABCC6. | n/a                                                        |
| 20 | Epilepsy, ?ADHD, learning difficulties                                                                                                                                                                 | 27 yrs | M   | 1 | 14,944,560 | 16,276,115 | 1,331,556 | N/K      | x1 ↓ | I-II     | NOMO1, MIR3179-1, MIR3179-2, MIR3179-3, MIR3180-1, MIR3180-2, MIR3180-3, NPIP, PDXDC1, NTAN1, RRN3, MIR3180-4, MPV17L, C16orf45, KIAA0430, NDE1, MIR484, MYH11, FOPNL, ABCC1, ABCC6. | n/a                                                        |
| 21 | Early onset unusual epilepsy, resistant to treatment, some learning difficulties                                                                                                                       | 15 yrs | M   | 1 | 14,944,560 | 16,305,736 | 1,361,177 | N/K      | x1 ↓ | I-II     | NOMO1, MIR3179-1, MIR3179-2, MIR3179-3, MIR3180-1, MIR3180-2, MIR3180-3, NPIP, PDXDC1, NTAN1, RRN3, MIR3180-4, MPV17L, C16orf45, KIAA0430, NDE1, MIR484, MYH11, FOPNL, ABCC1, ABCC6. | n/a                                                        |
| 22 | Global developmental delay, very small stature (below the 0.4th centile on all measurements)                                                                                                           | 2 yrs  | M   | 1 | 14,944,560 | 16,305,736 | 1,361,177 | Maternal | x1 ↓ | I-II     | NOMO1, MIR3179-1, MIR3179-2, MIR3179-3, MIR3180-1, MIR3180-2, MIR3180-3, NPIP, PDXDC1, NTAN1, RRN3, MIR3180-4, MPV17L, C16orf45, KIAA0430, NDE1, MIR484, MYH11, FOPNL, ABCC1, ABCC6. | n/a                                                        |
| 23 | Bilateral duplication of the hallux, delayed (atypical) cognitive development, digital abnormalities (eg syndactyly, polydactyly), facial dysmorphism (eg hypertelorism), mild delay, umbilical hernia | 1 yr   | F   | 1 | 14,944,560 | 16,305,736 | 1,361,177 | N/K      | x1 ↓ | I-II     | NOMO1, MIR3179-1, MIR3179-2, MIR3179-3, MIR3180-1, MIR3180-2, MIR3180-3, NPIP, PDXDC1, NTAN1, RRN3, MIR3180-4, MPV17L, C16orf45, KIAA0430, NDE1, MIR484, MYH11, FOPNL, ABCC1, ABCC6. | n/a                                                        |
| 24 | Social & communication disorder, behavioural difficulties, learning difficulties                                                                                                                       | 12 yrs | M   | 1 | 15,048,751 | 16,276,115 | 1,227,365 | N/K      | x1 ↓ | I-II     | PDXDC1, NTAN1, RRN3, MIR3180-4, MPV17L, C16orf45, KIAA0430, NDE1, MIR484, MYH11, FOPNL, ABCC1, ABCC6.                                                                                | n/a                                                        |
| 25 | N/K                                                                                                                                                                                                    | N/K    | F   | 1 | 15,048,751 | 16,305,736 | 1,256,986 | N/K      | x1 ↓ | I-II     | PDXDC1, NTAN1, RRN3, MIR3180-4, MPV17L, C16orf45, KIAA0430, NDE1, MIR484, MYH11, FOPNL, ABCC1, ABCC6.                                                                                | n/a                                                        |
| 26 | Fine motor delay, motor developmental delay, SMA                                                                                                                                                       | 10/12  | M   | 2 | 15,131,723 | 16,249,607 | 1,117,885 | Maternal | x1 ↓ | I-II     | NTAN1, RRN3, MIR3180-4, MPV17L, C16orf45, KIAA0430, NDE1, MIR484, MYH11, FOPNL, ABCC1, ABCC6.                                                                                        | x1 ↓,<br>chr17:<br>61,947,138-<br>61,985,739<br>(Maternal) |
| 27 | Autism, very challenging behavior                                                                                                                                                                      | 5 yrs  | M   | 1 | 15,144,120 | 16,276,115 | 1,131,996 | Maternal | x1 ↓ | I-II     | NTAN1, RRN3, MIR3180-4, MPV17L, C16orf45, KIAA0430, NDE1, MIR484, MYH11, FOPNL, ABCC1, ABCC6.                                                                                        | n/a                                                        |
| 28 | N/K                                                                                                                                                                                                    | N/K    | N/K | 2 | 14,944,560 | 18,141,051 | 3,196,492 | Maternal | x3 ↑ | I-II-III | NOMO1, MIR3179-1, MIR3179-2, MIR3179-3, MIR3180-1, MIR3180-2, MIR3180-3,                                                                                                             | x1 ↓,<br>chr6:                                             |

|    |                                                                                                                                                                       |       |   |   |            |            |           |                     |       |          |                                                                                                                                                                                                     |                                                                                              |
|----|-----------------------------------------------------------------------------------------------------------------------------------------------------------------------|-------|---|---|------------|------------|-----------|---------------------|-------|----------|-----------------------------------------------------------------------------------------------------------------------------------------------------------------------------------------------------|----------------------------------------------------------------------------------------------|
|    |                                                                                                                                                                       |       |   |   |            |            |           |                     |       |          | NPIP, PDXDC1, NTAN1, RRN3, MIR3180-4, MPV17L, C16orf45, KIAA0430, NDE1, MIR484, MYH11, FOPNL, ABCC1, ABCC6, NOMO3, MIR3179-1, MIR3179-2, MIR3179-3, MIR3180-1, MIR3180-2, MIR3180-3, PKD1P1, XYLT1. | 26,440,747-26,463,502 (Paternal)                                                             |
| 29 | Developmental delay, microcephaly                                                                                                                                     | 2 yrs | M | 2 | 15,048,751 | 18,306,854 | 3,258,104 | N/K                 | x1 ↓  | I-II-III | PDXDC1, NTAN1, RRN3, MIR3180-4, MPV17L, C16orf45, KIAA0430, NDE1, MIR484, MYH11, FOPNL, ABCC1, ABCC6, NOMO3, MIR3179-1, MIR3179-2, MIR3179-3, MIR3180-1, MIR3180-2, MIR3180-3, PKD1P1, XYLT1.       | x1 ↓,<br>chr7:<br>68,564,123-71,234,479                                                      |
| 30 | Hypoglycaemia and poor condition at delivery, poor tone and abnormal neurology at 2 months                                                                            | 2/12  | M | 1 | 15,496,838 | 16,311,070 | 814,233   | N/K                 | x3 ↑  | II       | MPV17L, C16orf45, KIAA0430, NDE1, MIR484, MYH11, FOPNL, ABCC1, ABCC6.                                                                                                                               | n/a                                                                                          |
| 31 | Hypocalcaemia, slight dysmorphic, developmental delay                                                                                                                 | 9/12  | M | 2 | 15,256,686 | 18,141,051 | 2,884,366 | N/K                 | x3 ↑  | II-III   | MPV17L, C16orf45, KIAA0430, NDE1, MIR484, MYH11, FOPNL, ABCC1, ABCC6, NOMO3, MIR3179-1, MIR3179-2, MIR3179-3, MIR3180-1, MIR3180-2, MIR3180-3, PKD1P1, XYLT1.                                       | x3 ↑,<br>chr7:<br>72,420,745-74,142,327                                                      |
| 32 | Developmental delay                                                                                                                                                   | 3 yrs | M | 1 | 15,256,686 | 18,141,051 | 2,884,366 | Maternal            | x3 ↑  | II-III   | MPV17L, C16orf45, KIAA0430, NDE1, MIR484, MYH11, FOPNL, ABCC1, ABCC6, NOMO3, MIR3179-1, MIR3179-2, MIR3179-3, MIR3180-1, MIR3180-2, MIR3180-3, PKD1P1, XYLT1.                                       | n/a                                                                                          |
| 33 | Asperger's syndrome                                                                                                                                                   | 4 yrs | M | 1 | 15,256,686 | 18,141,051 | 2,884,366 | Paternal            | x3 ↑  | II-III   | MPV17L, C16orf45, KIAA0430, NDE1, MIR484, MYH11, FOPNL, ABCC1, ABCC6, NOMO3, MIR3179-1, MIR3179-2, MIR3179-3, MIR3180-1, MIR3180-2, MIR3180-3, PKD1P1, XYLT1.                                       | n/a                                                                                          |
| 34 | Complex chromosome 7 rearrangement, developmental delay, dolicocephaly, hypotonia, large tongue, microcephaly, prominent forehead, weight in 50th centile, wide mouth | 5 yrs | F | 3 | 15,256,686 | 18,141,051 | 2,884,366 | N/K                 | x2~3↑ | II-III   | MPV17L, C16orf45, KIAA0430, NDE1, MIR484, MYH11, FOPNL, ABCC1, ABCC6, NOMO3, MIR3179-1, MIR3179-2, MIR3179-3, MIR3180-1, MIR3180-2, MIR3180-3, PKD1P1, XYLT1.                                       | x1~2 ↓,<br>chr7:<br>100,843,516-122,635,001.<br>x1~2 ↓,<br>chr7:<br>144,379,972-148,495,065. |
| 35 | Developmental delay, high pain threshold, hypertelorism, poor balance, prominent forehead, small chin + dimple, speech delay                                          | 5 yrs | M | 1 | 15,256,686 | 18,306,854 | 3,050,169 | Maternal (affected) | x3 ↑  | II-III   | MPV17L, C16orf45, KIAA0430, NDE1, MIR484, MYH11, FOPNL, ABCC1, ABCC6, NOMO3, MIR3179-1, MIR3179-2, MIR3179-3, MIR3180-1, MIR3180-2, MIR3180-3, PKD1P1, XYLT1.                                       | n/a                                                                                          |
| 36 | Obesity, raiding cupboards, smallish genitalia, temper tantrums when food is withheld, to exclude                                                                     | 7 yrs | M | 1 | 15,256,686 | 18,306,854 | 3,050,169 | Maternal            | x3 ↑  | II-III   | MPV17L, C16orf45, KIAA0430, NDE1, MIR484, MYH11, FOPNL, ABCC1, ABCC6, NOMO3, MIR3179-1, MIR3179-2, MIR3179-                                                                                         | n/a                                                                                          |

|    |                                                                                                                                                                            |       |   |   |            |            |           |                     |      |        |                                                                                                                                                                                                                                        |                                                            |
|----|----------------------------------------------------------------------------------------------------------------------------------------------------------------------------|-------|---|---|------------|------------|-----------|---------------------|------|--------|----------------------------------------------------------------------------------------------------------------------------------------------------------------------------------------------------------------------------------------|------------------------------------------------------------|
|    | PWS                                                                                                                                                                        |       |   |   |            |            |           |                     |      |        | 3, MIR3180-1, MIR3180-2, MIR3180-3, PKD1P1, XYLT1.                                                                                                                                                                                     |                                                            |
| 37 | Speech and language delay                                                                                                                                                  | 5 yrs | M | 1 | 15,256,686 | 18,546,759 | 3,290,074 | N/K                 | x3 ↑ | II-III | MPV17L, C16orf45, KIAA0430, NDE1, MIR484, MYH11, FOPNL, ABCC1, ABCC6, NOMO3, MIR3179-1, MIR3179-2, MIR3179-3, MIR3180-1, MIR3180-2, MIR3180-3, PKD1P1, XYLT1, MIR3179-1, MIR3179-2, MIR3179-3, MIR3180-1, MIR3180-2, MIR3180-3, NOMO2. | n/a                                                        |
| 38 | ASD, Asperger's syndrome                                                                                                                                                   | 9 yrs | M | 2 | 15,492,317 | 18,141,051 | 2,648,735 | N/K                 | x3 ↑ | II-III | MPV17L, C16orf45, KIAA0430, NDE1, MIR484, MYH11, FOPNL, ABCC1, ABCC6, NOMO3, MIR3179-1, MIR3179-2, MIR3179-3, MIR3180-1, MIR3180-2, MIR3180-3, PKD1P1, XYLT1.                                                                          | x3 ↑,<br>chrX:<br>620,267-<br>1,259,140                    |
| 39 | Seizure activity, history of continuous fitting, not dysmorphic                                                                                                            | 2/12  | F | 1 | 15,496,838 | 18,306,854 | 2,810,017 | N/K                 | x3 ↑ | II-III | MPV17L, C16orf45, KIAA0430, NDE1, MIR484, MYH11, FOPNL, ABCC1, ABCC6, NOMO3, MIR3179-1, MIR3179-2, MIR3179-3, MIR3180-1, MIR3180-2, MIR3180-3, PKD1P1, XYLT1.                                                                          | n/a                                                        |
| 40 | Global developmental delay, lissencephaly                                                                                                                                  | 17yrs | M | 1 | 15,496,838 | 18,546,759 | 3,049,922 | Paternal            | x3 ↑ | II-III | MPV17L, C16orf45, KIAA0430, NDE1, MIR484, MYH11, FOPNL, ABCC1, ABCC6, NOMO3, MIR3179-1, MIR3179-2, MIR3179-3, MIR3180-1, MIR3180-2, MIR3180-3, PKD1P1, XYLT1, MIR3179-1, MIR3179-2, MIR3179-3, MIR3180-1, MIR3180-2, MIR3180-3, NOMO2. | n/a                                                        |
| 41 | ASD, anomalous tracheobronchial tree, CHD, imperforate anus, IUGR, motor delay, proportionate microcephaly, rectovestibular fistula, very small, ventricular septal defect | 10/12 | F | 2 | 15,256,686 | 18,306,854 | 3,050,169 | De novo             | x1 ↓ | II-III | MPV17L, C16orf45, KIAA0430, NDE1, MIR484, MYH11, FOPNL, ABCC1, ABCC6, NOMO3, MIR3179-1, MIR3179-2, MIR3179-3, MIR3180-1, MIR3180-2, MIR3180-3, PKD1P1, XYLT1.                                                                          | x1 ↓,<br>chr17:<br>45,438,799-<br>45,507,261<br>(Maternal) |
| 42 | Raised blood pressure during pregnancy, scalded-skin syndrome                                                                                                              | 10/12 | M | 2 | 15,256,686 | 18,306,854 | 3,050,169 | Paternal (Affected) | x1 ↓ | II-III | MPV17L, C16orf45, KIAA0430, NDE1, MIR484, MYH11, FOPNL, ABCC1, ABCC6, NOMO3, MIR3179-1, MIR3179-2, MIR3179-3, MIR3180-1, MIR3180-2, MIR3180-3, PKD1P1, XYLT1.                                                                          | x1 ↓,<br>chr13:<br>23,566,962-<br>24,890,143<br>(Maternal) |
| 43 | Mild learning disabilities, moderate developmental delay, non dysmorphic                                                                                                   | 5 yrs | M | 1 | 15,492,317 | 18,306,854 | 2,814,538 | De novo             | x1 ↓ | II-III | MPV17L, C16orf45, KIAA0430, NDE1, MIR484, MYH11, FOPNL, ABCC1, ABCC6, NOMO3, MIR3179-1, MIR3179-2, MIR3179-3, MIR3180-1, MIR3180-2, MIR3180-3, PKD1P1, XYLT1.                                                                          | n/a                                                        |
| 44 | Global developmental delay (severe), motor delay, speech and language delay                                                                                                | 4 yrs | M | 2 | 15,492,317 | 18,306,854 | 2,814,538 | N/K                 | x1 ↓ | II-III | MPV17L, C16orf45, KIAA0430, NDE1, MIR484, MYH11, FOPNL, ABCC1, ABCC6, NOMO3, MIR3179-1, MIR3179-2, MIR3179-3, MIR3180-1, MIR3180-2, MIR3180-3,                                                                                         | x4 ↑,<br>chr4:<br>70,898,799-<br>70,917,149                |

|    |                                                                                                                                      |       |   |   |            |            |           |          |      |        |                                                                                                                                                               |     |
|----|--------------------------------------------------------------------------------------------------------------------------------------|-------|---|---|------------|------------|-----------|----------|------|--------|---------------------------------------------------------------------------------------------------------------------------------------------------------------|-----|
|    |                                                                                                                                      |       |   |   |            |            |           |          |      |        | PKD1P1, XYLT1.                                                                                                                                                |     |
| 45 | Developmental delay                                                                                                                  | 8/12  | M | 1 | 15,496,838 | 18,306,854 | 2,810,017 | Paternal | x1 ↓ | II-III | MPV17L, C16orf45, KIAA0430, NDE1, MIR484, MYH11, FOPNL, ABCC1, ABCC6, NOMO3, MIR3179-1, MIR3179-2, MIR3179-3, MIR3180-1, MIR3180-2, MIR3180-3, PKD1P1, XYLT1. | n/a |
| 46 | Developmental delay, haemangioma on forehead, prominent forehead, relative microcephaly, short nose, tented upper lip, upturned nose | 3 yrs | M | 1 | 15,677,026 | 18,141,051 | 2,464,026 | Maternal | x1 ↓ | II-III | C16orf45, KIAA0430, NDE1, MIR484, MYH11, FOPNL, ABCC1, ABCC6, NOMO3, MIR3179-1, MIR3179-2, MIR3179-3, MIR3180-1, MIR3180-2, MIR3180-3, PKD1P1, XYLT1.         | n/a |

Abbreviations: ASD, autism spectrum disorder; IUGR, intrauterine growth restriction; DCM, dilated cardiomyopathy; UTI, urinary tract infection; ADHD, attention deficit hyperactivity disorder; SMA, spinal muscular atrophy; PWS, Prader-Willi syndrome; CHD, congenital heart disease; CNV, copy number variant.  
Second imbalances in bold are disease-associated.
