# Supplementary material for: Male-Biased Autosomal Effect of 16p13.11 Copy Number Variation in Neurodevelopmental Disorders
Source: PubMed Central journal article supplement (PMC3630198; doi:10.1371/journal.pone.0061365), 2013-04-18
Supplement: pone.0061365.s004.pdf [file pone.0061365.s004.pdf]

**Table S2.** Duplications and deletions of 16p13.11 identified in the control cohorts

| Control  | Sex | HG19 start | HG19 stop  | Size (bp) | CNV  | CNV Interval | Genes encompassed by the CNV                                                                                                                                                                 | Rare second-hit CNVs >500kbp                                |
|----------|-----|------------|------------|-----------|------|--------------|----------------------------------------------------------------------------------------------------------------------------------------------------------------------------------------------|-------------------------------------------------------------|
| WTCCC2_1 | F   | 15,032,942 | 16,100,661 | 1,067,719 | x3 ↑ | I-II         | NPIP, PDXDC1, NTAN1, RRN3, MIR3180-4, MPV17L, C16orf45, KIAA0430, NDE1, MIR484, MYH11, FOPNL, ABCC1.                                                                                         | x1 ↓<br>Chr5: 95,425,820-96,818,211<br>Size (bp): 1,392,392 |
| WTCCC2_2 | F   | 15,032,942 | 16,190,572 | 1,157,630 | x3 ↑ | I-II         | NPIP, PDXDC1, NTAN1, RRN3, MIR3180-4, MPV17L, C16orf45, KIAA0430, NDE1, MIR484, MYH11, FOPNL, ABCC1.                                                                                         | x3 ↑<br>Chr2: 132,969,856-133,735,535<br>Size (bp): 765,680 |
| WTCCC2_3 | F   | 15,032,942 | 16,197,033 | 1,164,091 | x3 ↑ | I-II         | NPIP, PDXDC1, NTAN1, RRN3, MIR3180-4, MPV17L, C16orf45, KIAA0430, NDE1, MIR484, MYH11, FOPNL, ABCC1.                                                                                         |                                                             |
| WTCCC2_4 | M   | 15,032,942 | 16,541,073 | 1,508,132 | x3 ↑ | I-II         | NPIP, PDXDC1, NTAN1, RRN3, MIR3180-4, MPV17L, C16orf45, KIAA0430, NDE1, MIR484, MYH11, FOPNL, ABCC1, ABCC6, NOMO3, MIR3179-1, MIR3179-2, MIR3179-3, MIR3180-1, MIR3180-2, MIR3180-3, PKD1P1. |                                                             |
| Shaikh_1 | F   | 15,032,942 | 16,541,073 | 1,508,132 | x3 ↑ | I-II         | NPIP, PDXDC1, NTAN1, RRN3, MIR3180-4, MPV17L, C16orf45, KIAA0430, NDE1, MIR484, MYH11, FOPNL, ABCC1, ABCC6, NOMO3, MIR3179-1, MIR3179-2, MIR3179-3, MIR3180-1, MIR3180-2, MIR3180-3, PKD1P1. |                                                             |
| Shaikh_2 | M   | 15,037,441 | 16,197,033 | 1,159,593 | x3 ↑ | I-II         | NPIP, PDXDC1, NTAN1, RRN3, MIR3180-4, MPV17L, C16orf45, KIAA0430, NDE1, MIR484, MYH11, FOPNL, ABCC1.                                                                                         |                                                             |
| WTCCC2_5 | F   | 15,062,399 | 15,992,737 | 930,338   | x3 ↑ | I-II         | PDXDC1, NTAN1, RRN3, MIR3180-4, MPV17L, C16orf45, KIAA0430, NDE1, MIR484, MYH11, FOPNL.                                                                                                      |                                                             |
| WTCCC2_6 | M   | 15,062,399 | 16,003,652 | 941,253   | x3 ↑ | I-II         | PDXDC1, NTAN1, RRN3, MIR3180-4, MPV17L, C16orf45, KIAA0430, NDE1, MIR484, MYH11, FOPNL.                                                                                                      |                                                             |
| Cooper_1 | F   | 14,824,194 | 16,324,781 | 1,500,587 | x1 ↓ | I-II         | ABCC6P2, NOMO1, MIR3179-1, MIR3179-2, MIR3179-3, MIR3180-1, MIR3180-2, MIR3180-3, NPIP, PDXDC1, NTAN1, RRN3, MIR3180-4,                                                                      |                                                             |

|           |   |            |            |           |      |          |                                                                                                                                                                                               |                                                         |
|-----------|---|------------|------------|-----------|------|----------|-----------------------------------------------------------------------------------------------------------------------------------------------------------------------------------------------|---------------------------------------------------------|
|           |   |            |            |           |      |          | MPV17L, C16orf45, KIAA0430, NDE1, MIR484, MYH11, FOPNL, ABCC1, ABCC6.                                                                                                                         |                                                         |
| WTCCC2_7  | F | 15,032,942 | 16,197,033 | 1,164,091 | x1 ↓ | I-II     | NPIP, PDXDC1, NTAN1, RRN3, MIR3180-4, MPV17L, C16orf45, KIAA0430, NDE1, MIR484, MYH11, FOPNL, ABCC1.                                                                                          |                                                         |
| WTCCC2_8  | F | 15,032,942 | 16,197,033 | 1,164,091 | x1 ↓ | I-II     | NPIP, PDXDC1, NTAN1, RRN3, MIR3180-4, MPV17L, C16orf45, KIAA0430, NDE1, MIR484, MYH11, FOPNL, ABCC1.                                                                                          |                                                         |
| WTCCC2_9  | F | 15,032,942 | 16,197,033 | 1,164,091 | x1 ↓ | I-II     | NPIP, PDXDC1, NTAN1, RRN3, MIR3180-4, MPV17L, C16orf45, KIAA0430, NDE1, MIR484, MYH11, FOPNL, ABCC1.                                                                                          |                                                         |
| Shaikh_3  | F | 15,076,261 | 18,174,650 | 3,098,390 | x3 ↑ | I-II-III | PDXDC1, NTAN1, RRN3, MIR3180-4, MPV17L, C16orf45, KIAA0430, NDE1, MIR484, MYH11, FOPNL, ABCC1, ABCC6, NOMO3, MIR3179-1, MIR3179-2, MIR3179-3, MIR3180-1, MIR3180-2, MIR3180-3, PKD1P1, XYLT1. |                                                         |
| Cooper_2  | F | 15,387,380 | 18,007,300 | 2,619,920 | x3 ↑ | II-III   | MPV17L, C16orf45, KIAA0430, NDE1, MIR484, MYH11, FOPNL, ABCC1, ABCC6, NOMO3, MIR3179-1, MIR3179-2, MIR3179-3, MIR3180-1, MIR3180-2, MIR3180-3, PKD1P1, XYLT1.                                 |                                                         |
| WTCCC2_10 | F | 15,387,380 | 18,174,650 | 2,787,270 | x3 ↑ | II-III   | MPV17L, C16orf45, KIAA0430, NDE1, MIR484, MYH11, FOPNL, ABCC1, ABCC6, NOMO3, MIR3179-1, MIR3179-2, MIR3179-3, MIR3180-1, MIR3180-2, MIR3180-3, PKD1P1, XYLT1.                                 |                                                         |
| WTCCC2_11 | F | 15,387,380 | 18,174,650 | 2,787,270 | x3 ↑ | II-III   | MPV17L, C16orf45, KIAA0430, NDE1, MIR484, MYH11, FOPNL, ABCC1, ABCC6, NOMO3, MIR3179-1, MIR3179-2, MIR3179-3, MIR3180-1, MIR3180-2, MIR3180-3, PKD1P1, XYLT1.                                 |                                                         |
| WTCCC2_12 | M | 15,560,731 | 17,902,141 | 2,341,410 | x3 ↑ | II-III   | C16orf45, KIAA0430, NDE1, MIR484, MYH11, FOPNL, ABCC1, ABCC6, NOMO3, MIR3179-1, MIR3179-2, MIR3179-3, MIR3180-1, MIR3180-2, MIR3180-3, PKD1P1, XYLT1.                                         | x1 ↓<br>Chr16:1,110,513-1,994,156<br>Size (bp): 883,644 |

Abbreviation: CNV, copy number variant.
