# Supplementary material for: Male-Biased Autosomal Effect of 16p13.11 Copy Number Variation in Neurodevelopmental Disorders
Source: PubMed Central journal article supplement (PMC3630198; doi:10.1371/journal.pone.0061365), 2013-04-18
Supplement: pone.0061365.s005.pdf [file pone.0061365.s005.pdf]

**Table S3.** NAHR-mediated duplications and deletions of 16p13.11 in the DECIPHER cases.

| 16p13.11<br>CNV | Total Sample                     |                        | Male only          |                       | Female only        |                       |
|-----------------|----------------------------------|------------------------|--------------------|-----------------------|--------------------|-----------------------|
|                 | Cases<br>(N=18,451) <sup>a</sup> | Controls<br>(N=10,375) | Cases<br>(N=9,963) | Controls<br>(N=4,474) | Cases<br>(N=8,488) | Controls<br>(N=5,901) |
| All Dupl        | 61                               | 13                     | 32                 | 4                     | 27                 | 9                     |
| All Del         | 40                               | 4                      | 29                 | 0                     | 11                 | 4                     |
| Dupl I          | 0                                | 0                      | 0                  | 0                     | 0                  | 0                     |
| Dupl I+II       | 39                               | 8                      | 22                 | 3                     | 16                 | 5                     |
| Dupl I+II+III   | 0                                | 1                      | 0                  | 0                     | 0                  | 1                     |
| Dupl II         | 11                               | 0                      | 6                  | 0                     | 5                  | 0                     |
| Dupl II+III     | 10                               | 4                      | 4                  | 1                     | 5                  | 3                     |
| Dupl III        | 1                                | 0                      | 0                  | 0                     | 1                  | 0                     |
| Del I           | 0                                | 0                      | 0                  | 0                     | 0                  | 0                     |
| Del I+II        | 20                               | 4                      | 15                 | 0                     | 5                  | 4                     |
| Del I+II+III    | 1                                | 0                      | 1                  | 0                     | 0                  | 0                     |
| Del II          | 7                                | 0                      | 5                  | 0                     | 2                  | 0                     |
| Del II+III      | 11                               | 0                      | 7                  | 0                     | 4                  | 0                     |
| Del III         | 1                                | 0                      | 1                  | 0                     | 0                  | 0                     |

Abbreviations: Dupl, duplication; Del, deletion.

<sup>a</sup>The sex of two cases carrying a duplication of intervals I and II and a duplication of intervals II and III was unknown, consequently, we were unable to include them in the male or female subgroup.
