# Supplementary material for: Male-Biased Autosomal Effect of 16p13.11 Copy Number Variation in Neurodevelopmental Disorders
Source: PubMed Central journal article supplement (PMC3630198; doi:10.1371/journal.pone.0061365), 2013-04-18
Supplement: pone.0061365.s006.pdf [file pone.0061365.s006.pdf]

**Table S4.** Genotype–phenotype correlation for patients with duplication or deletion of 16p13.11 recorded in the DECIPHER database.

| DECIPHER ID | Diagnosis                                                                                                                                                                                                          | Age      | Sex   | Imbalance count | HG19 start | HG19 stop  | Size (Mb) | Inheritance                                                    | CNV     | CNV Interval | Other imbalance                                  |
|-------------|--------------------------------------------------------------------------------------------------------------------------------------------------------------------------------------------------------------------|----------|-------|-----------------|------------|------------|-----------|----------------------------------------------------------------|---------|--------------|--------------------------------------------------|
| 250140      | Unknown                                                                                                                                                                                                            | Unknown  | M     | 2               | 15,131,723 | 15,154,746 | 0.02      | Unknown                                                        | x1 ↓    | I            | x1 ↑,<br>chr2:<br>110,841,715-<br>110,980,342    |
| 265264      | Unknown                                                                                                                                                                                                            | 11 years | F     | 2               | 15,131,723 | 15,154,746 | 0.02      | Unknown                                                        | x1 ↓    | I            | x1 ↓,<br>chr12:<br>57,997,061-<br>58,025,372     |
| 265010      | Mental retardation/developmental delay                                                                                                                                                                             | 5 years  | M     | 2               | 14,784,988 | 16,432,990 | 1.65      | Familial inherited from parent with similar phenotype to child | x0.58 ↑ | I-II         | x1 ↓,<br>chr8:<br>93,045,671-<br>93,317,105      |
| 261417      | Mental retardation/developmental delay                                                                                                                                                                             | 11 years | other | 1               | 14,910,005 | 16,525,489 | 1.62      | Unknown                                                        | x0.58 ↑ | I-II         | n/a                                              |
| 263297      | Absence of septum pellucidum, duane anomaly, mental retardation/developmental delay, microcephaly, short stature.                                                                                                  | 2 years  | F     | 2               | 14,910,227 | 16,311,040 | 1.40      | Unknown                                                        | x0.53 ↑ | I-II         | x1 ↓,<br>chr1:<br>4,658,421-<br>12,912,596       |
| 248705      | Cleft uvula, high palate, hypertelorism, hypospadias, mental retardation/developmental delay, palpebral fissures slant down                                                                                        | Unknown  | F     | 2               | 14,944,559 | 16,305,736 | 1.36      | Familial inherited from normal parent                          | x0.52 ↑ | I-II         | x0.55 ↓,<br>chr2:<br>241,168,044-<br>242,102,761 |
| 254680      | Psychomotor delay, stereotypic movements, behavioural problems                                                                                                                                                     | 3 years  | M     | 1               | 14,944,560 | 15,960,084 | 1.02      | Familial inherited from normal mother                          | x0.58 ↑ | I-II         | n/a                                              |
| 253391      | Mental retardation/ developmental delay, speech delay, learning difficulties, obesity                                                                                                                              | 46 years | M     | 1               | 14,944,560 | 16,276,115 | 1.33      | Familial inherited from mildly affected mother (MR/DD)         | x 0.6 ↑ | I-II         | n/a                                              |
| 257832      | Severe intellectual disability, abnormal behaviour                                                                                                                                                                 | 16 years | F     | 1               | 14,944,560 | 16,305,677 | 1.36      | Familial inherited from mildly affected father (speech delay)  | x0.58 ↑ | I-II         | n/a                                              |
| 257159      | Mental retardation/ developmental delay, speech delay, learning difficulties, motor delay                                                                                                                          | 7 years  | F     | 1               | 14,944,560 | 16,305,716 | 1.36      | Familial inherited from mildly affected mother (MR/DD)         | x0.58 ↑ | I-II         | n/a                                              |
| 2141        | Advanced bone age/large epiphyses, autism/autistic behavior, generalized obesity, high birth weight (> 90th centile), kidneys general abnormalities, mental retardation/developmental delay, sleep disorders excl. | 11 years | M     | 1               | 14,944,560 | 16,305,736 | 1.36      | Unknown                                                        | x0.6 ↑  | I-II         | n/a                                              |

|        |                                                                                                                                                                                   |          |   |   |            |            |      |                                                        |         |      |                                                                           |
|--------|-----------------------------------------------------------------------------------------------------------------------------------------------------------------------------------|----------|---|---|------------|------------|------|--------------------------------------------------------|---------|------|---------------------------------------------------------------------------|
|        | apnoea, tall stature, proportionate                                                                                                                                               |          |   |   |            |            |      |                                                        |         |      |                                                                           |
| 253385 | Mental retardation/ developmental delay, multiple congenital anomalies                                                                                                            | 1 year   | M | 2 | 14,944,560 | 16,305,736 | 1.36 | De novo                                                | x0.6 ↑  | I-II | x1 ↑, chrX: 139,585,260-139,743,254                                       |
| 255024 | Mental retardation/ developmental delay, autism spectrum disorder, speech delay, learning difficulties, motor delay                                                               | 6 years  | M | 1 | 14,944,560 | 16,305,736 | 1.36 | Familial inherited from mildly affected mother (MR/DD) | x0.58 ↑ | I-II | n/a                                                                       |
| 253384 | Mental retardation/ developmental delay, speech delay, learning difficulties, physical dysmorphism, motor delay                                                                   | 13 years | M | 1 | 14,944,560 | 16,900,216 | 1.96 | Familial inherited from normal mother                  | x0.6 ↑  | I-II | n/a                                                                       |
| 253393 | Mental retardation/ developmental delay, ADHD, speech delay, learning difficulties, macrocephaly, physical dysmorphism, motor delay                                               | 7 years  | M | 1 | 14,944,560 | 16,900,216 | 1.96 | Familial inherited from mildly affected mother (MR/DD) | x0.6 ↑  | I-II | n/a                                                                       |
| 265049 | Mental retardation/developmental delay, seizure                                                                                                                                   | 17 years | F | 2 | 14,968,855 | 16,292,235 | 1.32 | Familial inherited from normal mother                  | x0.58 ↑ | I-II | x0.58 ↑, chr10: 92,095,432-92,594,891                                     |
| 258708 | Infantile spasms, mental retardation/developmental delay                                                                                                                          | 1 year   | F | 1 | 14,968,855 | 16,525,348 | 1.56 | Unknown                                                | x0.58 ↑ | I-II | n/a                                                                       |
| 252222 | Global psychomotor delay, severe speech delay, deafness, behavioural problems, brachycephaly, triangular and flat face, ptosis, high arched eyebrows, hypertelorism, short nares. | 4 years  | M | 2 | 15,048,551 | 16,276,256 | 1.23 | Familial inherited from normal mother                  | x0.48 ↑ | I-II | x0.61 ↑, chr11: 10,847,816-11,588,979                                     |
| 250745 | Autism/autistic behavior, mental retardation/developmental delay                                                                                                                  | 3 years  | M | 1 | 15,048,660 | 16,227,943 | 1.18 | Familial inherited from normal mother                  | x0.5 ↑  | I-II | n/a                                                                       |
| 253241 | Mental retardation/ developmental delay, speech delay, learning difficulties, multiple congenital anomalies, physical dysmorphism, motor delay                                    | 6 years  | F | 3 | 15,048,751 | 16,249,607 | 1.20 | Familial inherited from normal mother                  | x0.6 ↑  | I-II | x1 ↓, chr11: 76,376,798-85,689,145. x0.6 ↑, chr1: 160,797,550-161,275,220 |
| 261482 | Unknown                                                                                                                                                                           | Unknown  | F | 1 | 15,048,751 | 16,249,607 | 1.20 | Unknown                                                | x0.58 ↑ | I-II | n/a                                                                       |
| 261444 | Mental retardation/ developmental delay, learning difficulties                                                                                                                    | 11 years | M | 1 | 15,048,751 | 16,276,115 | 1.23 | Familial inherited from mildly affected father (MR/DD) | x0.58 ↑ | I-II | n/a                                                                       |
| 262145 | Mental retardation/ developmental delay, learning difficulties                                                                                                                    | 19 years | M | 1 | 15,048,751 | 16,276,115 | 1.23 | Familial inherited from normal father                  | x0.58 ↑ | I-II | n/a                                                                       |
| 262576 | Unknown                                                                                                                                                                           | 21 years | F | 1 | 15,048,751 | 16,276,115 | 1.23 | Unknown                                                | x0.58 ↑ | I-II | n/a                                                                       |

|        |                                                                                                                                                                                                          |          |   |   |            |            |      |                                                                                  |         |      |                                                  |
|--------|----------------------------------------------------------------------------------------------------------------------------------------------------------------------------------------------------------|----------|---|---|------------|------------|------|----------------------------------------------------------------------------------|---------|------|--------------------------------------------------|
| 253157 | Mental retardation/ developmental delay, speech delay, learning difficulties, physical dysmorphism                                                                                                       | 9 years  | F | 2 | 15,048,751 | 16,305,736 | 1.26 | Familial inherited from severely affected mother with similar phenotype to child | x0.6↑   | I-II | x0.6 ↑,<br>chr4:<br>113,930,347-<br>114,469,901  |
| 253387 | Unknown                                                                                                                                                                                                  | 1 year   | F | 1 | 15,048,751 | 16,305,736 | 1.26 | Unknown                                                                          | x0.6 ↑  | I-II | n/a                                              |
| 253395 | Mental retardation/ developmental delay, speech delay, learning difficulties, physical dysmorphism                                                                                                       | 8 years  | M | 1 | 15,048,751 | 16,305,736 | 1.26 | Familial inherited from mildly affected mother (MR/DD)                           | x0.6 ↑  | I-II | n/a                                              |
| 253682 | General facial abnormalities, mental retardation/developmental delay, seizures, general neurological abnormalities                                                                                       | 5 years  | F | 1 | 15,048,751 | 16,305,736 | 1.26 | Familial inherited from normal mother                                            | x0.63 ↑ | I-II | n/a                                              |
| 257447 | Mental retardation/ developmental delay, speech delay, learning difficulties, behavioural problems, motor delay                                                                                          | 10 years | M | 2 | 15,048,751 | 16,899,676 | 1.85 | Familial inherited from mildly affected mother (MR/DD)                           | x0.58 ↑ | I-II | x1 ↓,<br>chr2:<br>136,103,113-<br>136,226,458    |
| 264068 | Unknown                                                                                                                                                                                                  | 5 years  | M | 2 | 15,049,872 | 16,377,650 | 1.33 | Familial inherited from normal father                                            | x0.58 ↑ | I-II | x0.58 ↑,<br>chrX:<br>148,739,101-<br>148,839,812 |
| 254653 | Unknown                                                                                                                                                                                                  | 8 years  | F | 1 | 15,061,354 | 16,351,783 | 1.29 | Familial inherited from normal parent                                            | x0.58 ↑ | I-II | n/a                                              |
| 258268 | Unknown                                                                                                                                                                                                  | 9 years  | F | 1 | 15,081,354 | 16,305,736 | 1.22 | Unknown                                                                          | x0.58 ↑ | I-II | n/a                                              |
| 255021 | Mental retardation/ developmental delay, speech delay, learning difficulties, obesity, motor delay                                                                                                       | 7 years  | F | 1 | 15,081,354 | 16,899,676 | 1.82 | Familial inherited from mildly affected father (MR/DD)                           | x0.58 ↑ | I-II | n/a                                              |
| 2370   | Clinodactyly, flat face, generalized obesity, kyphosis, mental retardation/developmental delay, microstomia, patchy depigmentation of hair/white forelock, scoliosis, short attention span, speech delay | 13 years | M | 1 | 15,085,753 | 16,282,307 | 1.20 | De novo                                                                          | x3 ↑    | I-II | n/a                                              |
| 253394 | Mental retardation/ developmental delay, speech delay, learning difficulties, microcephaly                                                                                                               | 6 years  | M | 1 | 15,111,247 | 15,896,016 | 0.78 | Familial inherited from mildly affected father (MR/DD)                           | x0.6↑   | I-II | n/a                                              |
| 253392 | Unknown                                                                                                                                                                                                  | 19 years | M | 2 | 15,131,723 | 16,223,052 | 1.09 | Unknown                                                                          | x0.6 ↑  | I-II | x0.6 ↑,<br>chr8:<br>120,743,057-<br>120,942,109  |
| 263926 | Mental retardation/ developmental delay, speech delay, learning difficulties, multiple congenital                                                                                                        | 16 years | F | 1 | 15,131,723 | 16,276,115 | 1.14 | Familial inherited from normal mother                                            | x0.58 ↑ | I-II | n/a                                              |

|        |                                                                                                                                                                                                                            |          |   |   |            |            |      |                                                        |         |      |                                                                                                 |
|--------|----------------------------------------------------------------------------------------------------------------------------------------------------------------------------------------------------------------------------|----------|---|---|------------|------------|------|--------------------------------------------------------|---------|------|-------------------------------------------------------------------------------------------------|
|        | anomalies, physical dysmorphism, motor delay                                                                                                                                                                               |          |   |   |            |            |      |                                                        |         |      |                                                                                                 |
| 265945 | Mental retardation/ developmental delay, ADHD, speech delay, learning difficulties, physical dysmorphism                                                                                                                   | 6 years  | M | 1 | 15,131,723 | 16,276,115 | 1.14 | Familial inherited from mildly affected mother (MR/DD) | x0.58 ↑ | I-II | n/a                                                                                             |
| 250327 | Mental retardation/developmental delay                                                                                                                                                                                     | Unknown  | M | 2 | 15,131,723 | 16,305,736 | 1.17 | Familial inherited from normal father                  | x0.56 ↑ | I-II | x1 ↓,<br>chr2:<br>192,543,344-<br>199,484,582                                                   |
| 253390 | Mental retardation/ developmental delay, ADHD, learning difficulties                                                                                                                                                       | 6 years  | M | 1 | 15,131,723 | 16,305,736 | 1.17 | Familial inherited from mildly affected father (MR/DD) | x0.6 ↑  | I-II | n/a                                                                                             |
| 262593 | Mental retardation/ developmental delay, speech delay, multiple congenital anomalies, physical dysmorphism, motor delay                                                                                                    | 2 years  | M | 3 | 15,131,723 | 16,999,359 | 1.87 | Familial inherited from mildly affected father (MR/DD) | x0.58 ↑ | I-II | x0.58 ↑,<br>chrX:<br>73,505,754-<br>74,131,641.<br>x1 ↓,<br>chr15:<br>20,481,702-<br>23,179,948 |
| 4697   | Camptodactyly, high palate, high/prominent nasal bridge, mental retardation/developmental delay, microcephaly, seizures, general neurological abnormalities, short palpebral fissures, simple ears, syndactyly 2-3 of toes | 17 years | M | 1 | 14,759,767 | 16,282,307 | 1.52 | Unknown                                                | x1 ↓    | I-II | n/a                                                                                             |
| 259236 | Flat malar region, mental retardation/developmental delay, palpebral fissures slant down, simple/absent philtrum, tonic/clonic (grand-mal)                                                                                 | 13 years | M | 2 | 14,762,269 | 16,194,548 | 1.43 | Familial inherited from normal mother                  | x1 ↓    | I-II | x0.58 ↑,<br>chr3:<br>141,810,136-<br>142,180,905                                                |
| 253689 | Mental retardation/developmental delay                                                                                                                                                                                     | Unknown  | M | 2 | 14,944,560 | 16,249,607 | 1.31 | Familial inherited from normal father                  | x0.62 ↓ | I-II | x0.58 ↑,<br>chr19:<br>5,155,515-<br>5,641,847                                                   |
| 254155 | Unknown                                                                                                                                                                                                                    | 14 years | M | 1 | 14,944,560 | 16,249,607 | 1.31 | Unknown                                                | x1 ↓    | I-II | n/a                                                                                             |
| 254156 | Mental retardation/ developmental delay, epilepsy, speech delay, learning difficulties, multiple congenital anomalies, physical dysmorphism, motor delay                                                                   | 18 years | F | 1 | 14,944,560 | 16,249,607 | 1.31 | Familial inherited from mildly affected mother (MR/DD) | x1 ↓    | I-II | n/a                                                                                             |
| 250060 | Bladder abnormalities, mental retardation/developmental delay, post-axial polydactyly of fingers, seizures                                                                                                                 | Unknown  | M | 1 | 14,944,560 | 16,305,736 | 1.36 | Familial inherited from normal mother                  | x0.7 ↓  | I-II | n/a                                                                                             |
| 248942 | Mental retardation/developmental                                                                                                                                                                                           | 8 years  | M | 1 | 14,944,560 | 16,305,736 | 1.36 | De novo                                                | x1 ↓    | I-II | n/a                                                                                             |

|        |                                                                                                                                                                                                                                                                                                                                                                  |          |   |    |            |            |      |                                                        |         |          |                                                                                                 |
|--------|------------------------------------------------------------------------------------------------------------------------------------------------------------------------------------------------------------------------------------------------------------------------------------------------------------------------------------------------------------------|----------|---|----|------------|------------|------|--------------------------------------------------------|---------|----------|-------------------------------------------------------------------------------------------------|
|        | delay, microcephaly                                                                                                                                                                                                                                                                                                                                              |          |   |    |            |            |      |                                                        |         |          |                                                                                                 |
| 250144 | Unknown                                                                                                                                                                                                                                                                                                                                                          | Unknown  | F | 1  | 14,944,560 | 16,305,736 | 1.36 | Unknown                                                | x1 ↓    | I-II     | n/a                                                                                             |
| 250673 | Unknown                                                                                                                                                                                                                                                                                                                                                          | Unknown  | F | 1  | 14,944,560 | 16,305,736 | 1.36 | Unknown                                                | x1 ↓    | I-II     | n/a                                                                                             |
| 253383 | Mental retardation/ developmental delay, epilepsy, speech delay, microcephaly, motor delay                                                                                                                                                                                                                                                                       | 2 years  | F | 1  | 14,944,560 | 16,305,736 | 1.36 | Familial inherited from mildly affected father (MR/DD) | x1 ↓    | I-II     | n/a                                                                                             |
| 266248 | Arched eyebrows, broad nasal tip, mental retardation /developmental delay, prominent mandible, short neck, synophrys.                                                                                                                                                                                                                                            | 1 years  | M | 3  | 14,944,560 | 16,999,359 | 2.05 | De novo                                                | x1 ↓    | I-II     | x1 ↓,<br>chr1:<br>244,571,975-<br>246,704,522.<br>x1 ↓,<br>chr3:<br>179,066,692-<br>179,161,826 |
| 265329 | Face abnormalities, mental retardation/developmental delay.                                                                                                                                                                                                                                                                                                      | 10 years | M | 1  | 14,968,855 | 16,267,306 | 1.30 | Familial inherited from normal father                  | x1 ↓    | I-II     | n/a                                                                                             |
| 250947 | Nuchal bleb/cystic hygroma of neck                                                                                                                                                                                                                                                                                                                               | Unknown  | M | 1  | 14,968,855 | 16,292,235 | 1.32 | De novo                                                | x0.95 ↓ | I-II     | n/a                                                                                             |
| 262837 | Mental retardation/developmental delay, seizure, speech delay                                                                                                                                                                                                                                                                                                    | 21 years | F | 1  | 14,968,856 | 16,267,250 | 1.30 | Unknown                                                | x1 ↓    | I-II     | n/a                                                                                             |
| 262572 | Unknown                                                                                                                                                                                                                                                                                                                                                          | 11 years | M | 1  | 15,048,751 | 16,276,115 | 1.23 | Unknown                                                | x1 ↓    | I-II     | n/a                                                                                             |
| 264391 | Unknown                                                                                                                                                                                                                                                                                                                                                          | 5 years  | M | 2  | 15,048,751 | 16,276,115 | 1.23 | Unknown                                                | x1 ↓    | I-II     | x0.58 ↑,<br>chr1:<br>20,830,940-<br>21,076,211                                                  |
| 265253 | Unknown                                                                                                                                                                                                                                                                                                                                                          | 3 years  | M | 1  | 15,048,751 | 16,276,115 | 1.23 | Unknown                                                | x1 ↓    | I-II     | n/a                                                                                             |
| 251347 | Autism/autistic behaviour                                                                                                                                                                                                                                                                                                                                        | 8 years  | M | 1  | 15,048,751 | 16,276,115 | 1.23 | Unknown                                                | x1 ↓    | I-II     | n/a                                                                                             |
| 248936 | Club foot, varus, mental retardation/developmental delay                                                                                                                                                                                                                                                                                                         | 6 years  | M | 1  | 15,131,723 | 16,276,115 | 1.14 | Unknown                                                | x1 ↓    | I-II     | n/a                                                                                             |
| 253378 | Mental retardation/ developmental delay, autism spectrum disorder, motor delay                                                                                                                                                                                                                                                                                   | 2 years  | M | 1  | 15,144,120 | 16,276,115 | 1.13 | Familial inherited from mildly affected father (MR/DD) | x1 ↓    | I-II     | n/a                                                                                             |
| 248654 | Almond shaped palpebral fissures, columella below alae nasi, cryptorchid testes, face general abnormalities, inguinal hernia, kyphosis, large ears, long philtrum, macrocephaly, mental retardation/developmental delay, myopia, nevi or lentigines, obesity, general build abnormalities, premature greying of hair, round face, thin lower lip, thin upper lip | 27 years | M | 31 | 14,864,502 | 18,707,663 | 3.84 | Unknown                                                | x0.79↓  | I-II-III | See table legend                                                                                |
| 266757 | Unknown                                                                                                                                                                                                                                                                                                                                                          | 4 years  | M | 2  | 15,423,703 | 16,855,348 | 1.43 | Familial inherited                                     | x0.58↑  | II       | x1 ↓,                                                                                           |

|        |                                                                                                                                                                                |          |   |   |            |            |      |                                                        |         |    |                                             |
|--------|--------------------------------------------------------------------------------------------------------------------------------------------------------------------------------|----------|---|---|------------|------------|------|--------------------------------------------------------|---------|----|---------------------------------------------|
|        |                                                                                                                                                                                |          |   |   |            |            |      | from normal father                                     |         |    | chr4:<br>177,167,513-<br>182,264,756        |
| 2508   | Arachnodactyly, autism/autistic behavior, feeding problems in infants, fine hair, mental retardation/developmental delay, short stature, strabismus, thin or slender build     | 16 years | F | 1 | 15,491,527 | 16,282,387 | 0.79 | Familial inherited from normal mother                  | x0.6↑   | II | n/a                                         |
| 253683 | General facial abnormalities, mental retardation/developmental delay                                                                                                           | Unknown  | M | 1 | 15,492,317 | 16,276,115 | 0.78 | Familial inherited from normal mother                  | x0.61 ↑ | II | n/a                                         |
| 263405 | Unknown                                                                                                                                                                        | 7 years  | F | 2 | 15,492,317 | 16,276,175 | 0.78 | Unknown                                                | x0.58 ↑ | II | x1 ↑<br>chr16:<br>16,899,617-<br>28,574,419 |
| 250061 | Congenital cardiac anomaly                                                                                                                                                     | Unknown  | M | 1 | 15,492,317 | 16,305,736 | 0.81 | De novo                                                | x0.5 ↑  | II | n/a                                         |
| 253386 | Mental retardation/ developmental delay, ADHD, speech delay, learning difficulties, obesity, motor delay                                                                       | 26 years | F | 1 | 15,492,317 | 16,305,736 | 0.81 | Familial inherited from mildly affected mother (MR/DD) | x0.6 ↑  | II | n/a                                         |
| 253389 | Mental retardation/ developmental delay, speech delay, behavioural problems, physical dysmorphism                                                                              | 2 years  | M | 1 | 15,492,317 | 16,305,736 | 0.81 | Familial inherited from mildly affected mother (MR/DD) | x0.6 ↑  | II | n/a                                         |
| 1046   | Behavioral problems, general neurological abnormalities, constipation, headache/migraine/body pain, megacolon or Hirschsprung syndrome, mental retardation/developmental delay | 17 years | M | 1 | 15,504,454 | 16,284,248 | 0.78 | Unknown                                                | x0.52 ↑ | II | n/a                                         |
| 1498   | Cleft palate, mental retardation/developmental delay, small mandible/micrognathia, triphalangeal thumb                                                                         | 8 years  | F | 1 | 15,504,454 | 16,284,248 | 0.78 | Unknown                                                | x0.6 ↑  | II | n/a                                         |
| 256961 | Mental retardation/developmental delay                                                                                                                                         | 6 years  | M | 1 | 15,551,331 | 16,041,568 | 0.49 | Familial inherited from normal mother                  | x0.85 ↑ | II | n/a                                         |
| 253388 | Mental retardation/ developmental delay, speech delay, learning difficulties, microcephaly, motor delay                                                                        | 8 years  | F | 1 | 15,579,295 | 16,305,736 | 0.73 | Familial inherited from normal mother                  | x0.6↑   | II | n/a                                         |
| 253377 | Mental retardation/ developmental delay, speech delay, learning difficulties, microcephaly, physical dysmorphism, motor delay                                                  | 7 years  | F | 1 | 15,492,317 | 16,305,736 | 0.81 | Familial inherited from mildly affected mother (MR/DD) | x1 ↓    | II | n/a                                         |
| 248952 | Unknown                                                                                                                                                                        | Unknown  | M | 1 | 15,492,345 | 16,276,086 | 0.78 | De novo                                                | x1 ↓    | II | n/a                                         |
| 605    | Cataract, mental                                                                                                                                                               | 13 years | M | 1 | 15,504,454 | 16,284,248 | 0.78 | Familial inherited                                     | x0.78 ↓ | II | n/a                                         |

|        |                                                                                                                                                                                                                                                                                       |          |         |   |            |            |      |                                                        |         |        |                                                                                                             |
|--------|---------------------------------------------------------------------------------------------------------------------------------------------------------------------------------------------------------------------------------------------------------------------------------------|----------|---------|---|------------|------------|------|--------------------------------------------------------|---------|--------|-------------------------------------------------------------------------------------------------------------|
|        | retardation/developmental delay                                                                                                                                                                                                                                                       |          |         |   |            |            |      | from normal mother                                     |         |        |                                                                                                             |
| 1230   | Auricular tags, cleft palate, complete absence of nose, cyclopia, dysplastic ears, holoprosencephaly/rhinencephaly, midline cleft upper lip, narrow/atretic auditory canal                                                                                                            | Unknown  | F       | 1 | 15,504,454 | 16,284,248 | 0.78 | Familial inherited from normal parent                  | x0.86 ↓ | II     | n/a                                                                                                         |
| 1497   | Constipation, hallux valgus, macrocephaly, mental retardation/developmental delay                                                                                                                                                                                                     | 18 years | M       | 1 | 15,504,454 | 16,284,248 | 0.78 | Familial inherited from normal parent                  | x0.81 ↓ | II     | n/a                                                                                                         |
| 265691 | Unknown                                                                                                                                                                                                                                                                               | 1 year   | M       | 1 | 15,551,102 | 16,194,719 | 0.64 | Familial inherited from normal father                  | x1 ↓    | II     | n/a                                                                                                         |
| 254370 | Unknown                                                                                                                                                                                                                                                                               | Unknown  | M       | 1 | 15,551,302 | 16,194,578 | 0.64 | Unknown                                                | x1 ↓    | II     | n/a                                                                                                         |
| 265619 | Unknown                                                                                                                                                                                                                                                                               | 29 years | M       | 1 | 15,404,481 | 18,141,021 | 2.74 | Unknown                                                | x0.58 ↑ | II-III | n/a                                                                                                         |
| 256495 | Unknown                                                                                                                                                                                                                                                                               | Unknown  | M       | 2 | 15,404,482 | 18,669,696 | 3.27 | Familial inherited from normal parent                  | x0.5 ↑  | II-III | x0.5 ↓,<br>chr10:<br>96,540,466-<br>98,634,100                                                              |
| 249225 | Agenesis/hypoplasia of corpus callosum, club foot, varus, glabella bone defect, high/prominent nasal bridge, polydactyly/bifid hallux, short stature, short limbs, small/hypoplastic/deepset nails                                                                                    | Unknown  | M       | 1 | 15,491,527 | 18,669,725 | 3.18 | Familial inherited from normal mother                  | x0.6 ↑  | II-III | n/a                                                                                                         |
| 265499 | Mental retardation/ developmental delay, ADHD, speech delay, learning difficulties, multiple congenital anomalies, physical dysmorphism, obesity, motor delay                                                                                                                         | 6 years  | M       | 1 | 15,492,317 | 18,112,776 | 2.62 | Familial inherited from mildly affected father (MR/DD) | x0.58 ↑ | II-III | n/a                                                                                                         |
| 256859 | Mental retardation/developmental delay, round face                                                                                                                                                                                                                                    | 2 years  | Unknown | 3 | 15,492,317 | 18,306,854 | 2.81 | De novo                                                | x0.58 ↑ | II-III | <b>x0.58↑,<br/>chr15:<br/>20,239,986-<br/>30,730,572</b><br>x0.58 ↑,<br>chr15:<br>20,481,702-<br>22,558,756 |
| 993    | Asymmetric face, atrial septum defect, choanal atresia/stenosis, coloboma of retina/choroid, dilated ureters/ureteral atresia, dysplastic ears, epicanthic folds, myopia, N.VII abnormal/palsy (nerve only), primary amenorrhea, renal agenesis, short neck, simple ears, strabismus, | 21 years | F       | 1 | 15,504,454 | 17,409,257 | 1.90 | Familial inherited from normal parent                  | x0.51 ↑ | II-III | n/a                                                                                                         |

|        |                                                                                                                                                                                                                                                                        |          |   |   |            |            |      |                                                        |         |        |                                                                                                                                |
|--------|------------------------------------------------------------------------------------------------------------------------------------------------------------------------------------------------------------------------------------------------------------------------|----------|---|---|------------|------------|------|--------------------------------------------------------|---------|--------|--------------------------------------------------------------------------------------------------------------------------------|
|        | vestibular apparatus abnormalities                                                                                                                                                                                                                                     |          |   |   |            |            |      |                                                        |         |        |                                                                                                                                |
| 248318 | Autism/autistic behavior, facial abnormalities, mental retardation/developmental delay, speech delay, tall stature                                                                                                                                                     | 12 years | F | 1 | 15,504,454 | 17,409,257 | 1.90 | Unknown                                                | x0.35 ↑ | II-III | n/a                                                                                                                            |
| 250915 | Autism/autistic behavior, facial abnormalities, hypotonia (non-myopathic), low-set ears, mental retardation/developmental delay, microcephaly, mid-face hypoplasia, short stature, proportionate, small feet, small hands                                              | 12 years | F | 3 | 15,504,454 | 18,839,990 | 3.34 | Familial inherited from normal mother                  | x0.5 ↑  | II-III | <b>x0.79 ↓,</b><br><b>chr1:</b><br><b>241,469,419-</b><br><b>248,865,374</b><br>x0.4 ↑,<br>chr20:<br>61,267,634-<br>62,906,195 |
| 250130 | Strabismus/gaze palsy, mental retardation/developmental delay                                                                                                                                                                                                          | 3 years  | F | 1 | 15,533,023 | 18,164,698 | 2.63 | De novo                                                | x0.34 ↑ | II-III | n/a                                                                                                                            |
| 4598   | Abnormal sacrum, absent ribs, atrial septum defect, auricular pits/fistulas, clinodactyly, club foot, varus, deep-set eyes, hemivertebrae, hypoplastic or absent tibia, narrow thorax/funnel chest, polydactyly/bifid thumb, scoliosis, trachea or laryngeal anomalies | Unknown  | F | 1 | 15,533,023 | 18,264,088 | 2.73 | Unknown                                                | x0.58 ↑ | II-III | n/a                                                                                                                            |
| 253379 | Mental retardation/ developmental delay, motor delay                                                                                                                                                                                                                   | Unknown  | M | 1 | 15,256,686 | 18,112,776 | 2.86 | Familial inherited from normal father                  | x1 ↓    | II-III | n/a                                                                                                                            |
| 253380 | Mental retardation/ developmental delay, speech delay, learning difficulties, microcephaly, physical dysmorphism, motor delay                                                                                                                                          | 4 years  | F | 1 | 15,256,686 | 18,112,776 | 2.86 | Familial inherited from mildly affected mother (MR/DD) | x1 ↓    | II-III | n/a                                                                                                                            |
| 248716 | Paroxysmal apnoea/tachypnoea, cerebellar hemisphere hypoplasia, feeding problems in infants, large (mega) cisterna magna, mental retardation/developmental delay, post-axial polydactyly of toes                                                                       | Unknown  | F | 2 | 15,492,316 | 18,546,759 | 3.05 | Familial inherited from normal parent                  | x0.86 ↓ | II-III | <b>x1 ↓,</b><br><b>chr3:</b><br><b>1,213,906-</b><br><b>2,218,784</b>                                                          |
| 253376 | Mental retardation/ developmental delay, speech delay, motor delay                                                                                                                                                                                                     | 2 years  | M | 1 | 15,492,317 | 18,112,776 | 2.62 | Familial inherited from mildly affected father (MR/DD) | x1 ↓    | II-III | n/a                                                                                                                            |
| 260266 | Unknown                                                                                                                                                                                                                                                                | 18 years | M | 1 | 15,492,317 | 18,112,776 | 2.62 | Unknown                                                | x1 ↓    | II-III | n/a                                                                                                                            |
| 261058 | Mental retardation/ developmental delay, speech delay, learning difficulties, motor delay                                                                                                                                                                              | Unknown  | M | 2 | 15,492,317 | 18,112,776 | 2.62 | Familial inherited from mildly affected father (MR/DD) | x1 ↓    | II-III | <b>x0.58 ↑,</b><br><b>chr1:</b><br><b>144,995,225-</b><br><b>147,786,706</b>                                                   |

|        |                                                                                                                                                                                             |          |   |   |            |            |      |                                       |        |        |                                                                                                             |
|--------|---------------------------------------------------------------------------------------------------------------------------------------------------------------------------------------------|----------|---|---|------------|------------|------|---------------------------------------|--------|--------|-------------------------------------------------------------------------------------------------------------|
| 263206 | Mental retardation/ developmental delay, autism spectrum disorder, speech delay, learning difficulties, motor delay                                                                         | 6 years  | M | 1 | 15,492,317 | 18,112,776 | 2.62 | De novo                               | x0,5 ↓ | II-III | n/a                                                                                                         |
| 261748 | Cleft palate, mental retardation/developmental delay, narrow thorax/funnel chest, patchy pigment of skin/cafe au lait spots, pulmonary stenosis, short stature, small mandible/micrognathia | 12 years | F | 2 | 15,521,713 | 17,804,366 | 2.28 | De novo                               | x1 ↓   | II-III | <b>x1 ↓,<br/>chr15:<br/>31,728,919-<br/>39,743,689</b>                                                      |
| 250104 | Behavioral problems, fetal finger pads, mental retardation/developmental delay                                                                                                              | Unknown  | M | 1 | 15,533,023 | 18,264,088 | 2.73 | De novo                               | x1 ↓   | II-III | n/a                                                                                                         |
| 250291 | Unknown                                                                                                                                                                                     | Unknown  | M | 1 | 15,533,023 | 18,839,788 | 3.31 | Familial inherited from normal parent | x1 ↓   | II-III | n/a                                                                                                         |
| 251115 | Mental retardation/developmental delay, seizures, Vision general abnormalities                                                                                                              | 15 years | F | 1 | 15,533,023 | 18,839,788 | 3.31 | Familial inherited from normal parent | x1 ↓   | II-III | n/a                                                                                                         |
| 250908 | Unknown                                                                                                                                                                                     | Unknown  | F | 3 | 16,899,617 | 18,141,051 | 1.24 | Unknown                               | x0.5 ↑ | III    | x0.5 ↑,<br>chr6:<br>142,233,257-<br>143,089,666<br><b>x0.8 ↓,<br/>chr22:<br/>18,894,835-<br/>21,505,417</b> |
| 250436 | Short stature, general abnormalities                                                                                                                                                        | Unknown  | M | 1 | 16,668,903 | 18,264,088 | 1.60 | Unknown                               | x1 ↓   | III    | n/a                                                                                                         |

Abbreviation: CNV, copy number variant.  
Second imbalances in bold are disease-associated.

Patient 248654, additional genomic imbalances:

Chr1: 104163703-104297301 x0.73↑, Chr2: 89122523-89475400 x0.51↑, Chr3: 195315926-195732015 x0.47↓, Chr4: 9324656-9359762 x1.44↑, Chr4: 10212244-10227435 x4.59↑, Chr4: 34781004-34814779 x1.44↑, Chr4: 69386967-69500230 x3.18↑, Chr4: 69456441-69483277 x5.9↑, Chr4: 94059618-94104576 x1.23↑, Chr4: 168810788-168991830 x0.95↑, Chr5: 12813036-12820111 x6.22↓, Chr5: 140223255-140227460 x5.57↑, Chr6: 103738389-103753939 x5.16↑, Chr7: 141730168-141785258 x0.78↓, Chr10: 46756764-48372528 x0.44↓, Chr11: 5792681-5805665 x5.27↑, Chr12: 9637322-9693948 x1.60↑, Chr13: 70747355-70762514 x1.12↑, Chr14: 19434574-19554442 x0.59↓, Chr14: 106263099-106811243 x0.76↑, Chr14: 106334906-106351204 x5.07↑, Chr15: 24487786-24504519 x2.54↑, Chr15: 34695165-34841446 x0.61↑, Chr16: 34452584-34747588 x0.48↓, Chr16: 74375793-74442234 x0.92↓, Chr18: 65855190-65891899 x0.77↓, Chr22: 20326985-20465445 x0.72↓, Chr22: 22462628-23238919 x0.37↑, Chr22: 24376165-24395353 x3.11↑, ChrX: 70121-160747 x1.75↑.
