# Supplementary material for: Male-Biased Autosomal Effect of 16p13.11 Copy Number Variation in Neurodevelopmental Disorders
Source: PubMed Central journal article supplement (PMC3630198; doi:10.1371/journal.pone.0061365), 2013-04-18
Supplement: pone.0061365.s007.pdf [file pone.0061365.s007.pdf]

## Supplementary Methods

### **Male-biased autosomal effect of 16p13.11 copy number variation in neurodevelopmental disorders**

Maria Tropeano<sup>1\*</sup>, Joo Wook Ahn<sup>2</sup>, Richard JB Dobson<sup>1</sup>, Gerome Breen<sup>1</sup>, James Rucker<sup>1</sup>, Abhishek Dixit<sup>1</sup>, Deb K Pal<sup>3</sup>, Peter McGuffin<sup>1</sup>, Anne Farmer<sup>1</sup>, Peter S White<sup>4,5</sup>, Joris Andrieux<sup>6</sup>, Evangelos Vassos<sup>1</sup>, Caroline Mackie Ogilvie<sup>2</sup>, Sarah Curran<sup>1</sup>, David A Collier<sup>1,7\*</sup>

- (1) MRC Social, Genetic and Developmental Psychiatry Centre, Institute of Psychiatry, King's College London, London, UK.
- (2) Department of Cytogenetics, Guy's and St Thomas' NHS Foundation Trust, London, UK.
- (3) Department of Clinical Neuroscience, Institute of Psychiatry, King's College London, London, UK.
- (4) Center for Biomedical Informatics, The Children's Hospital of Philadelphia, Philadelphia, Pennsylvania, USA.
- (5) Division of Oncology, The Children's Hospital of Philadelphia, Philadelphia, Pennsylvania, USA.
- (6) Institut de Génétique Médicale, CHRU de Lille, Lille, France.
- (7) Discovery Neuroscience Research, Eli Lilly and Company Ltd, Lilly Research Laboratories, Erl Wood Manor, Windlesham, Surrey, UK.

Correspondence: [maria.tropeano@kcl.ac.uk](mailto:maria.tropeano@kcl.ac.uk) ; [collier\\_david\\_andrew@lilly.com](mailto:collier_david_andrew@lilly.com) .

## Control CNV analysis and quality controls

Screened control samples were genotyped on the Illumina (San Diego, California, USA) HumanHap 610-Quad beadchip, whereas WTCCC2 samples were genotyped on a modified Illumina 1M beadchip. To ensure comparable CNV detection from different array types, control CNVs were identified using a consensus marker set between the 610K and 1M chips, which mimics the Illumina HumanHap 550 beadchip. We were granted access to the chip intensity data (Illumina '.idat' files). All probe intensity data were normalised and processed using standard Illumina protocols with Illumina's GenomeStudio platform to obtain the log R ratio (LRR) and B allele frequency (BAF) at each marker. The LRR and BAF represent, for each marker in each sample, a summed probe intensity ratio derived from comparison to a canonical value calculated from all samples and, in the case of bi-allelic probes, an allelic intensity ratio respectively. We processed LRR and BAF values for 562,680 autosomal markers (99.9% SNP markers) using PennCNV (version released August 2009), a popular, open-source package designed for Illumina array data that implements a hidden Markov model, a Viterbi algorithm, expectation maximisation and takes account of the distance between consecutive markers to make copy number calls.

Samples with a genotype call rate of less than 98%, a B allele frequency standard deviation (BAFSD) of more than 0.045 or a log R ratio standard deviation (LRRSD) of more than 0.3 were excluded from analysis. We excluded all CNVs of less than 100kb and all CNVs made with less than 10 consecutive markers. We excluded samples with more than a total of 20 CNVs, as such samples are more likely to contain artefactual calls. We excluded calls that fell within 500kb of the centromere or telomere of each chromosome and any calls falling within immunoglobulin regions, as such calls are more likely in DNA derived from immortalised cell lines. We excluded calls occurring in more than 1% of the sample, and calls made over regions of the genome where the marker density was low (<1 marker per 200,000bp).

**Table SM1a.** Samples surviving each stage of quality control. Stage 1- exclusion by genotype call rate (<98%). Stage 2- exclusion by LRRSD ( $\leq 0.3$ ) BAFSD ( $\leq 0.045$ ) across autosomal chromosomes and total number of CNVs ( $\leq 20$ ) across autosomal chromosomes. NB. A larger proportion of screened control samples were excluded at QC stage 1 due to a batch of samples with poor DNA quality.

| QC stage        | Gender | Screened controls | WTCCC2 controls |         |
|-----------------|--------|-------------------|-----------------|---------|
|                 |        |                   | NBS             | 58C     |
| All samples     | Male   | 100.00%           | 100.00%         | 100.00% |
|                 | Female | 100.00%           | 100.00%         | 100.00% |
|                 | Total  | 100.00%           | 100.00%         | 100.00% |
|                 |        |                   | 100.00%         |         |
| Post QC stage 1 | Male   | 87.08%            | 95.46%          | 94.93%  |
|                 | Female | 95.73%            | 96.82%          | 95.85%  |
|                 | Total  | 92.37%            | 96.15%          | 95.38%  |
|                 |        |                   | 95.75%          |         |
| Post QC stage 2 | Male   | 74.19%            | 90.50%          | 87.90%  |
|                 | Female | 86.62%            | 90.16%          | 90.54%  |
|                 | Total  | 82.08%            | 90.33%          | 89.19%  |
|                 |        |                   | 89.74%          |         |

**Table SM1b.** CNV quality control. QC stage 1- any CNV with a constituent number of SNPs of less than 10 or a length less than 100kb was removed. QC stage 2- all CNVs with more than 50% overlap with immunoglobulin regions or regions defined as within 500kb of the centromere or telomere (Table SM1c) were removed. QC stage 3- all samples with more than a total of 20 CNVs were removed. QC stage 4- all CNVs from genomic regions with less than 1 marker per 200kb in our marker set were removed. QC stage 5- all CNVs occurring at >1% frequency in our population control sample were removed from all cohorts. NB The relatively large proportion of calls remaining in the WTCCC2 sample at QC stages 1 and 2 are likely to be attributed to variants introduced during cell line creation in the 1958 birth cohort.

| Cohort/QC Stage                      | Screened Controls | WTCCC2 Controls |
|--------------------------------------|-------------------|-----------------|
| <b>All CNVs<br/>(post sample QC)</b> | 5,710             | 120,042         |
|                                      | 100.00%           | 100.00%         |
| <b>QC stage 1</b>                    | 736               | 34,408          |
|                                      | 12.89%            | 28.66%          |
| <b>QC stage 2</b>                    | 676               | 33,133          |
|                                      | 11.84%            | 27.60%          |
| <b>QC stage 3</b>                    | 507               | 9,288           |
|                                      | 8.88%             | 7.74%           |
| <b>QC stage 4</b>                    | 503               | 9,226           |
|                                      | 8.81%             | 7.69%           |
| <b>QC stage 5</b>                    | 321               | 6,790           |
|                                      | 5.62%             | 5.66%           |

**Table SM1c.** Exclusion regions.

| Area           | Region 1                  | Region 2                  |
|----------------|---------------------------|---------------------------|
| Immunoglobulin | chr22:20715572-21595082   | N/A                       |
| Immunoglobulin | chr14:105065301-106352275 | N/A                       |
| Immunoglobulin | chr2:88937989-89411302    | N/A                       |
| Immunoglobulin | chr14:21159897-22090937   | N/A                       |
| Centromere     | chr1:121000001-128100000  | N/A                       |
| Centromere     | chr2:90900001-95800000    | N/A                       |
| Centromere     | chr3:89300001-93300000    | N/A                       |
| Centromere     | chr4:48600001-52500000    | N/A                       |
| Centromere     | chr5:45700001-50600000    | N/A                       |
| Centromere     | chr6:58300001-63500000    | N/A                       |
| Centromere     | chr7:57300001-61200000    | N/A                       |
| Centromere     | chr8:43100001-48200000    | N/A                       |
| Centromere     | chr9:46600001-60400000    | N/A                       |
| Centromere     | chr10:38700001-42200000   | N/A                       |
| Centromere     | chr11:51300001-56500000   | N/A                       |
| Centromere     | chr12:33100001-36600000   | N/A                       |
| Centromere     | chr13:13400001-18500000   | N/A                       |
| Centromere     | chr14:13500001-19200000   | N/A                       |
| Centromere     | chr15:14000001-18500000   | N/A                       |
| Centromere     | chr16:34300001-40800000   | N/A                       |
| Centromere     | chr17:22000001-23300000   | N/A                       |
| Centromere     | chr18:15300001-17400000   | N/A                       |
| Centromere     | chr19:26600001-30300000   | N/A                       |
| Centromere     | chr20:25600001-28500000   | N/A                       |
| Centromere     | chr21:9900001-13300000    | N/A                       |
| Centromere     | chr22:9500001-16400000    | N/A                       |
| Telomere       | chr1:1-500000             | chr1:246749719-247249719  |
| Telomere       | chr2:1-500000             | chr2:242451149-242951149  |
| Telomere       | chr3:1-500000             | chr3:199001827-199501827  |
| Telomere       | chr4:1-500000             | chr4:190773063-191273063  |
| Telomere       | chr5:1-500000             | chr5:180357866-180857866  |
| Telomere       | chr6:1-500000             | chr6:170399992-170899992  |
| Telomere       | chr7:1-500000             | chr7:158321424-158821424  |
| Telomere       | chr8:1-500000             | chr8:145774826-146274826  |
| Telomere       | chr9:1-500000             | chr9:139773252-140273252  |
| Telomere       | chr10:1-500000            | chr10:134874737-135374737 |
| Telomere       | chr11:1-500000            | chr11:133952384-134452384 |
| Telomere       | chr12:1-500000            | chr12:131849534-132349534 |
| Telomere       | chr13:1-500000            | chr13:113642980-114142980 |
| Telomere       | chr14:1-500000            | chr14:105868585-106368585 |
| Telomere       | chr15:1-500000            | chr15:99838915-100338915  |
| Telomere       | chr16:1-500000            | chr16:88327254-88827254   |
| Telomere       | chr17:1-500000            | chr17:78274742-78774742   |
| Telomere       | chr18:1-500000            | chr18:75617153-76117153   |
| Telomere       | chr19:1-500000            | chr19:63311651-63811651   |
| Telomere       | chr20:1-500000            | chr20:61935964-62435964   |
| Telomere       | chr21:1-500000            | chr21:46444323-46944323   |
| Telomere       | chr22:1-500000            | chr22:49191432-49691432   |

**Table SM2.** Platforms and probe coverage at the 16p13.11 locus (Chr16: 14.66-18.70 Mb, GRCh37) for arrays used in cases and controls.

| <b>Sample</b>                  | <b>n</b> | <b>Evaluation platform</b> | <b>Probe coverage</b> | <b>NAHR-med Duplications</b> | <b>NAHR-med Deletions</b> |
|--------------------------------|----------|----------------------------|-----------------------|------------------------------|---------------------------|
| BB-GRE Cases                   | 10,397   | 60K Agilent oligo array    | 49                    | 28                           | 16                        |
| Screened Controls              | 348      | Illumina HumanHap 550K     | 520                   | 0                            | 0                         |
| WTCCC2 Controls                | 4,828    | Illumina HumanHap 550K     | 520                   | 9                            | 3                         |
| Shaikh Controls                | 2,026    | Illumina HumanHap 550K     | 520                   | 3                            | 0                         |
| Cooper et al (London controls) | 760      | Illumina HumanHap 550K     | 520                   | 0                            | 0                         |
| Cooper et al (HGDP controls)   | 984      | Illumina HumanHap 650Y     | 604                   | 0                            | 0                         |
| Cooper et al (FHCRC controls)  | 1,429    | Illumina Quad 610K         | 625                   | 1                            | 1                         |

**Figure SM1.** Probe distribution at the 16p13.11 locus (Chr16:14.66-18.70Mb, GRCh37) for arrays used in cases and controls. Despite the lower probe density compared to the Illumina SNP arrays, the Agilent 60K array provides an adequate probe coverage of the three single copy sequence intervals (I, II and III) at 16p13.11-p12.3, appropriate for the detection of the large (>800 kbp) NAHR-mediated 16p13.11 variations, which encompass one or more of the three genomic intervals.

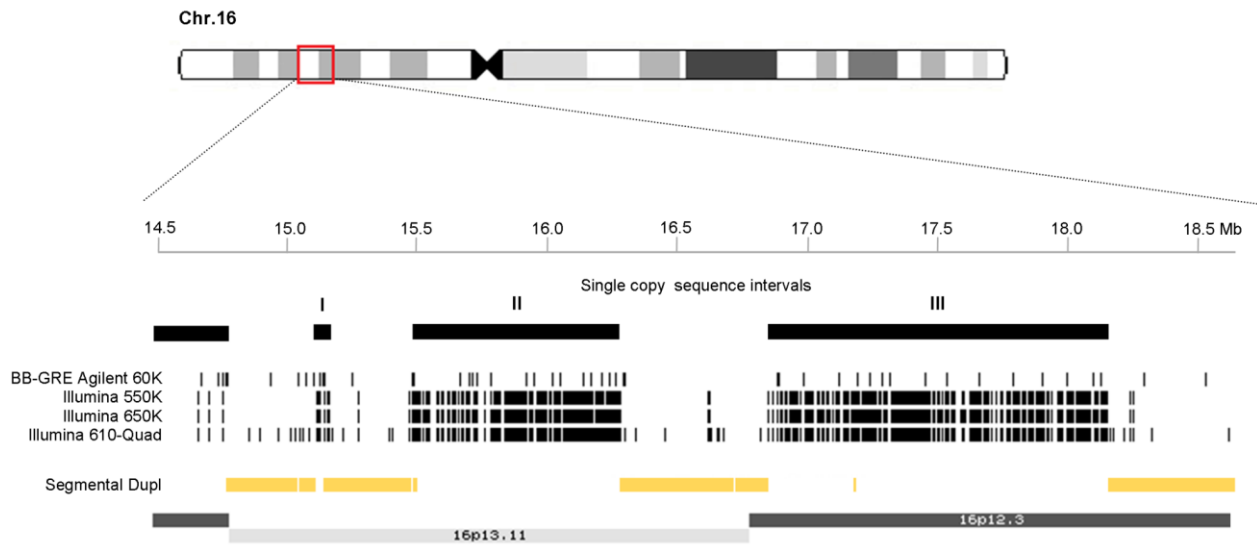

**Table SM3.** BB-GRE 60K Agilent oligonucleotide array probes at the 16p13.11 locus (Chr16: 14.66-18.70 Mb, GRCh37).

| <b>Chr</b> | <b>HG19 start</b> | <b>HG19 stop</b> |
|------------|-------------------|------------------|
| chr16      | 14.680.168        | 14.680.229       |
| chr16      | 14.742.264        | 14.742.325       |
| chr16      | 14.762.237        | 14.762.298       |
| chr16      | 14.771.032        | 14.771.093       |
| chr16      | 14.780.133        | 14.780.194       |
| chr16      | 14.944.558        | 14.944.619       |
| chr16      | 15.048.749        | 15.048.810       |
| chr16      | 15.081.352        | 15.081.412       |
| chr16      | 15.111.245        | 15.111.295       |
| chr16      | 15.131.721        | 15.131.782       |
| chr16      | 15.144.118        | 15.144.179       |
| chr16      | 15.154.685        | 15.154.746       |
| chr16      | 15.256.684        | 15.256.745       |
| chr16      | 15.492.315        | 15.492.372       |
| chr16      | 15.496.836        | 15.496.897       |
| chr16      | 15.677.024        | 15.677.085       |
| chr16      | 15.711.354        | 15.711.415       |
| chr16      | 15.719.338        | 15.719.399       |
| chr16      | 15.740.949        | 15.741.010       |
| chr16      | 15.795.562        | 15.795.623       |
| chr16      | 15.929.433        | 15.929.494       |
| chr16      | 15.960.082        | 15.960.143       |
| chr16      | 16.031.653        | 16.031.714       |
| chr16      | 16.060.382        | 16.060.443       |
| chr16      | 16.148.693        | 16.148.754       |
| chr16      | 16.180.944        | 16.181.005       |
| chr16      | 16.222.991        | 16.223.052       |
| chr16      | 16.249.546        | 16.249.607       |
| chr16      | 16.276.054        | 16.276.115       |
| chr16      | 16.305.675        | 16.305.736       |
| chr16      | 16.311.009        | 16.311.070       |
| chr16      | 16.895.833        | 16.895.894       |
| chr16      | 16.899.615        | 16.899.676       |
| chr16      | 16.999.298        | 16.999.359       |
| chr16      | 17.134.562        | 17.134.623       |
| chr16      | 17.202.183        | 17.202.240       |
| chr16      | 17.250.129        | 17.250.190       |
| chr16      | 17.298.052        | 17.298.113       |
| chr16      | 17.330.185        | 17.330.246       |



|       |            |            |
|-------|------------|------------|
| chr16 | 17.468.580 | 17.468.641 |
| chr16 | 17.550.935 | 17.550.996 |
| chr16 | 17.675.943 | 17.676.004 |
| chr16 | 17.804.305 | 17.804.366 |
| chr16 | 17.917.640 | 17.917.701 |
| chr16 | 18.012.400 | 18.012.461 |
| chr16 | 18.112.715 | 18.112.776 |
| chr16 | 18.140.990 | 18.141.051 |
| chr16 | 18.306.804 | 18.306.854 |
| chr16 | 18.546.698 | 18.546.759 |
